# Supplementary material for: Hollow core–shell structured Si/C nanocomposites as high-performance anode materials for lithium-ion batteries
Source: Royal Society of Chemistry journal article supplement (doi:10.1039/c3nr03090c), 2013-12-12
Supplement: c3nr03090c.pdf [file c3nr03090c.pdf]

## Electronic Supplementary Information

# Hollow core-shell structured Si/C nanocomposites as high-performance anode materials for lithium-ion batteries

Huachao Tao, Li-Zhen Fan\*, Wei-Li Song, Mao Wu, Xinbo He and Xuanhui Qu

Institute of Advanced Materials and Technology, University of Science and Technology Beijing,  
Beijing, 100083, China.

\*Corresponding author. Tel./fax: +86 10 62334311.

E-mail address: fanlizhen@ustb.edu.cn (L.-Z. Fan)

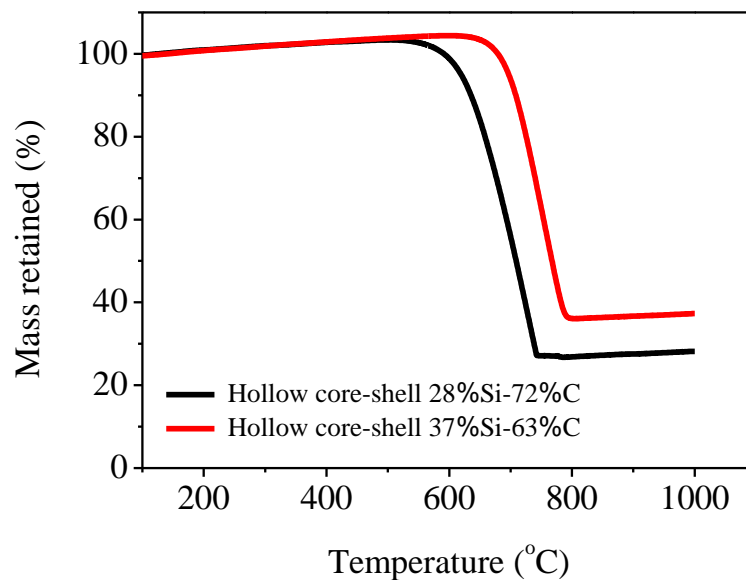

Figure S1. TGA curves of hollow core-shell structured Si/C nanocomposites and core-shell structured Si/C nanocomposite.

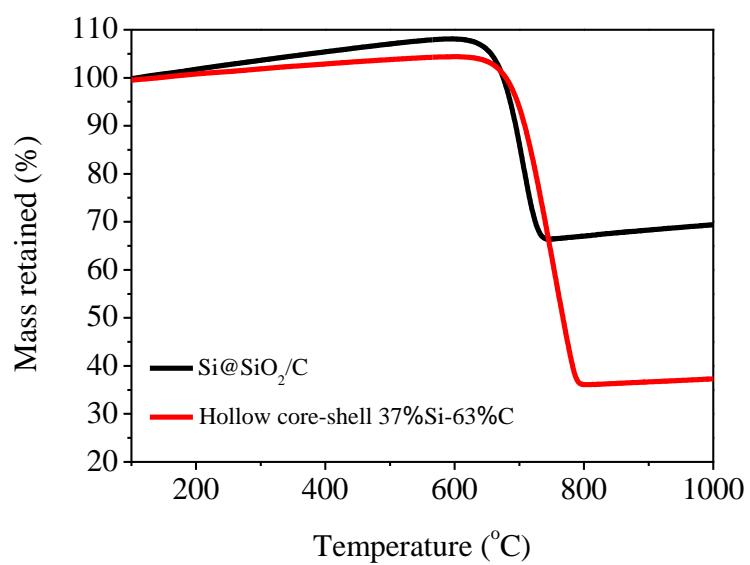

Figure S2. TGA curves of Si@SiO<sub>2</sub>/C nanocomposite and hollow core-shell 37%Si-63%C nanocomposite.
